# Supplementary material
Source: publisher figshare collection journal article supplement (https://springernature.figshare.com/ndownloader/files/21928989)
Supplement: Supplementary file 1 [file 21928989]

**MRC scale of muscle power**

(0) = no muscle contraction.
(1) = mild muscle contraction with no joint movement.
(2) = muscle contraction generating movement when the effect of gravity was eliminated.

(3) = muscle contraction generating movement against gravity.
(4) = muscle contraction generating movement against gravity and with some resistance.

(5) =muscle contraction generating movement against gravity and with full resistance.

(***Şahin and colleagues, 2014***)**(10)**
